# Supplementary material
Source: PubMed Central journal article supplement (PMC2077293)

**A**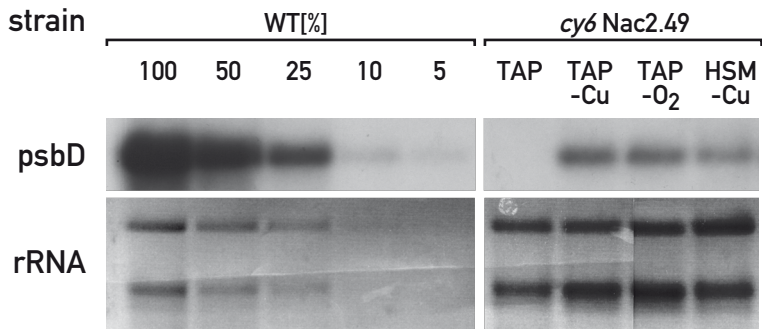**B**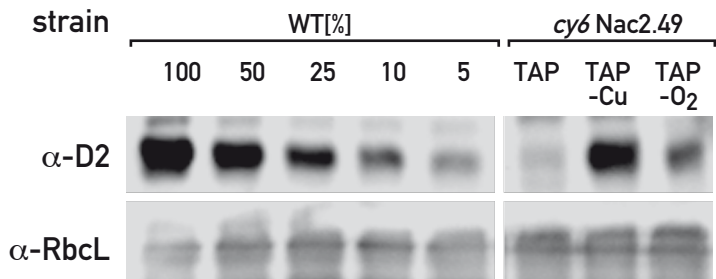**C**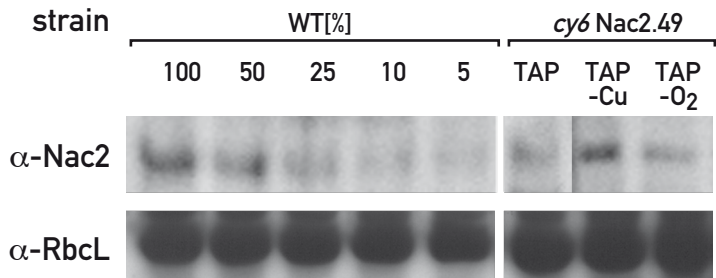

Supplement: pnas_0704205104_1.pdf [file pnas_0704205104_1.pdf]

**A**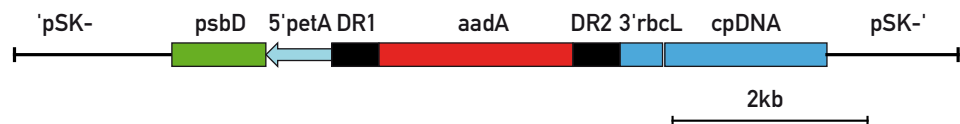**B**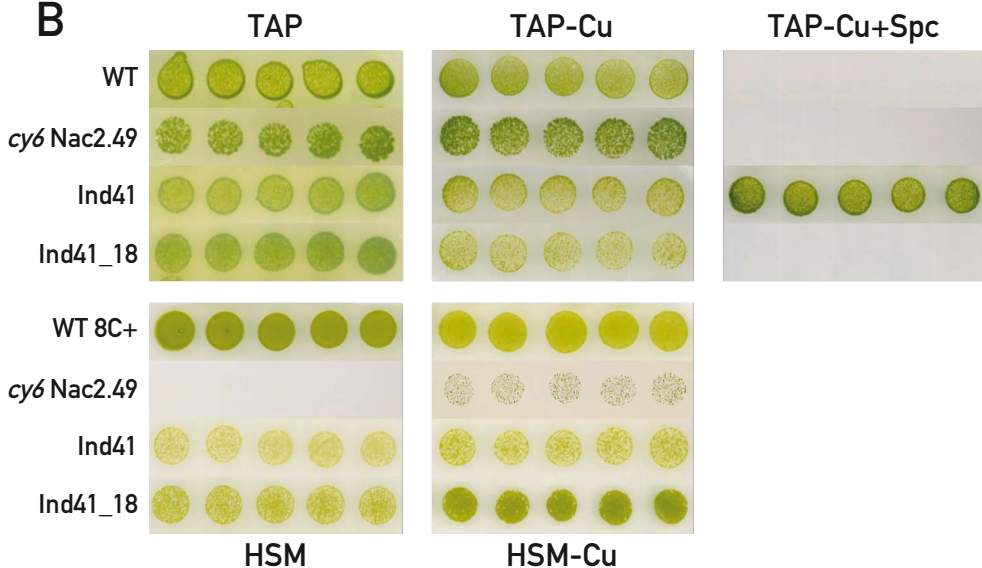**C**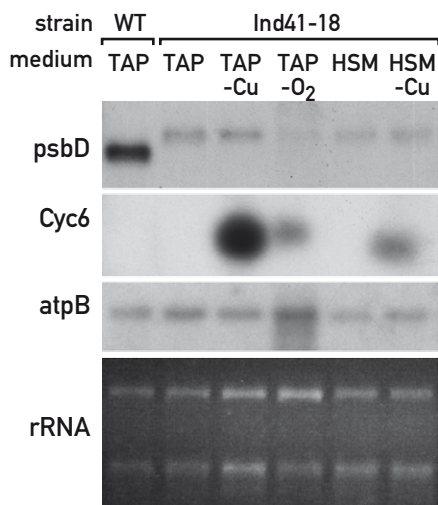**D**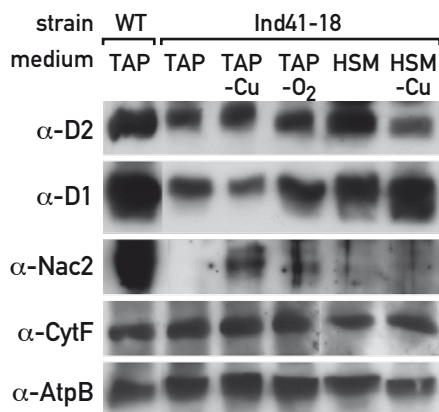

Supplement: pnas_0704205104_2.pdf [file pnas_0704205104_2.pdf]

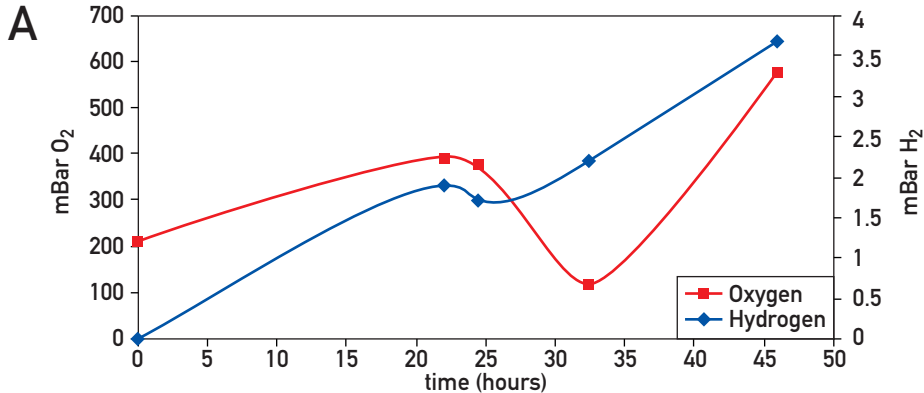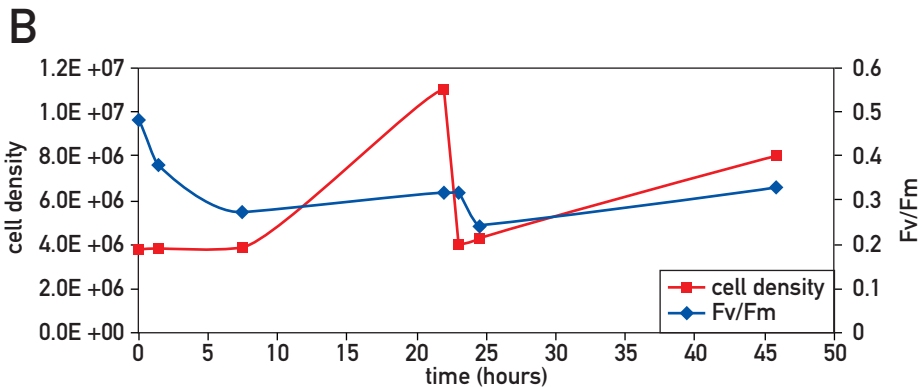

Supplement: pnas_0704205104_3.pdf [file pnas_0704205104_3.pdf]
